# Supplementary material for: The Effect of Direct and Indirect EZH2 Inhibition in Rhabdomyosarcoma Cell Lines
Source: MDPI journal article supplement (doi:10.3390/cancers14010041), 2021-12-23

Figure S1A

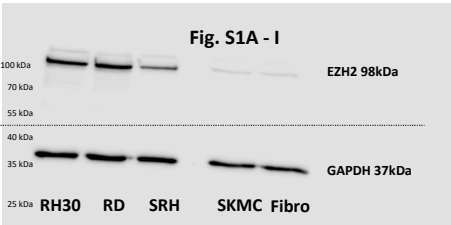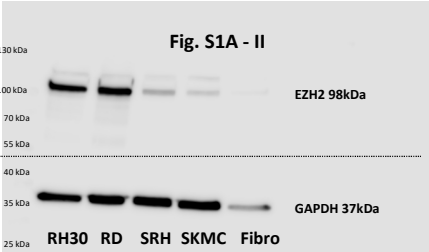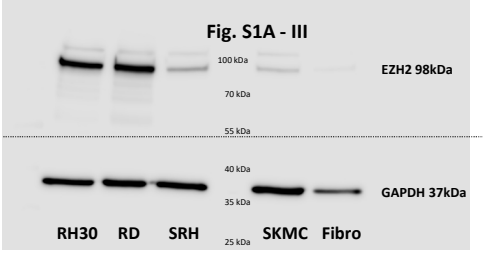

Figure S1B-F

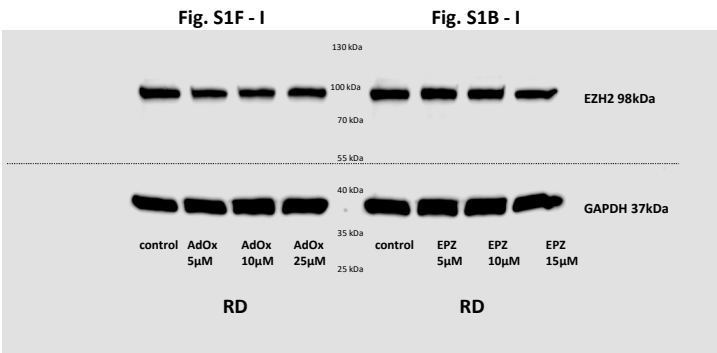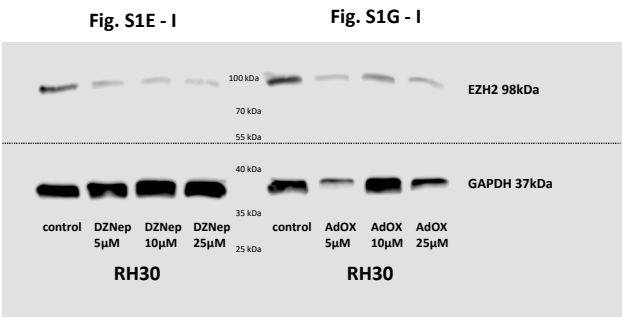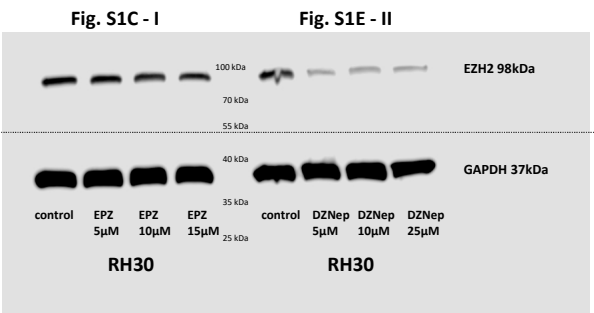

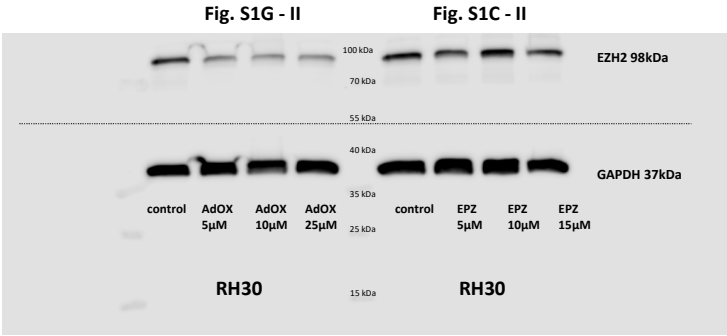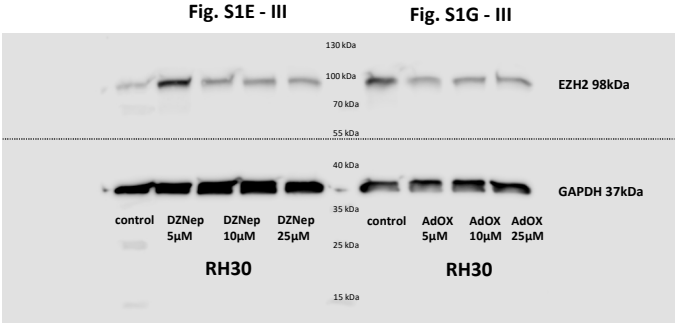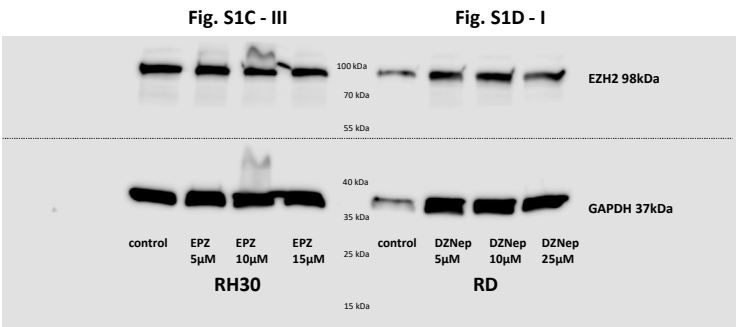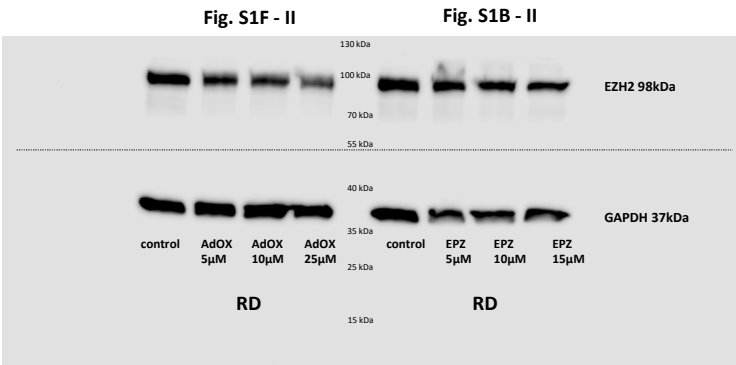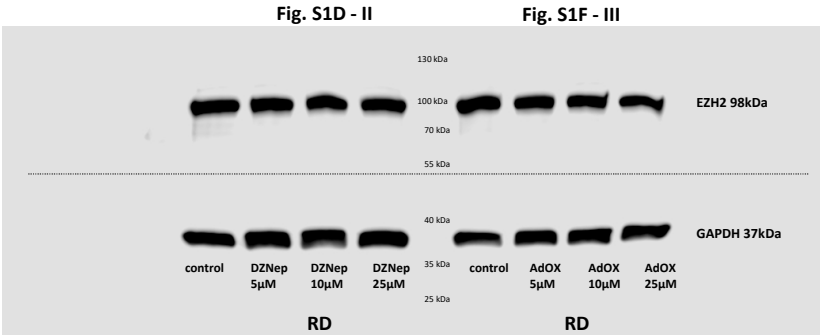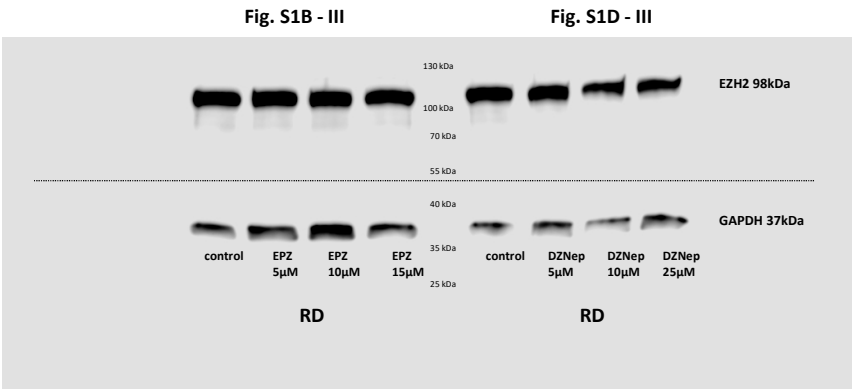

Fig. S1D – II – repeat

Fig. S1F – III – repeat

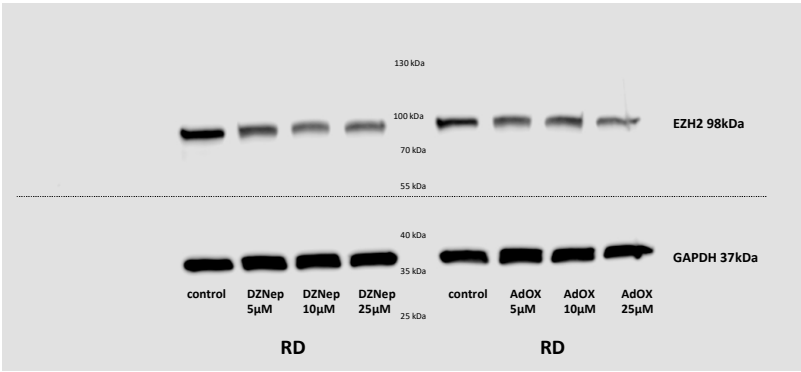

Fig. S1G - IV

Fig. S1D - IV

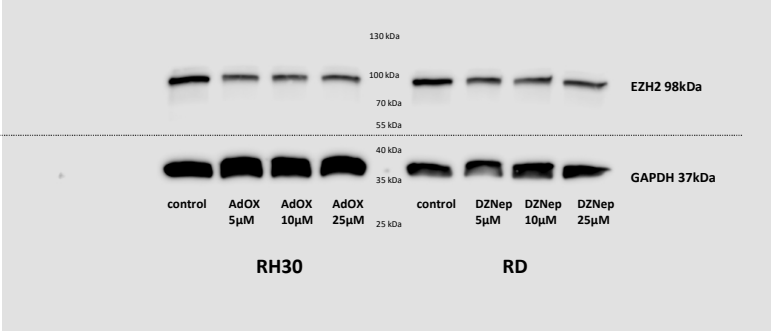

Fig. S1F – II – repeat

Fig. S1B – II – repeat

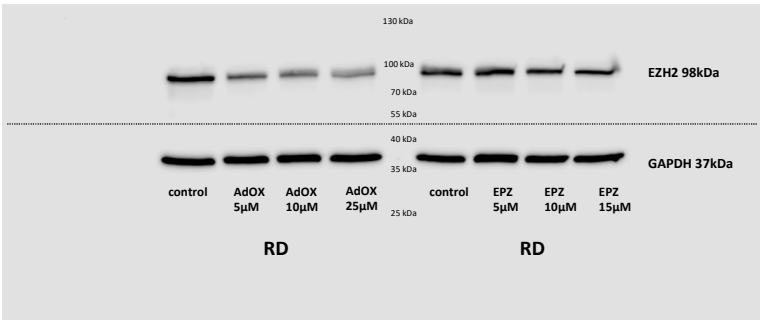

Fig. S1B – III – repeat

Fig. S1D – III – repeat

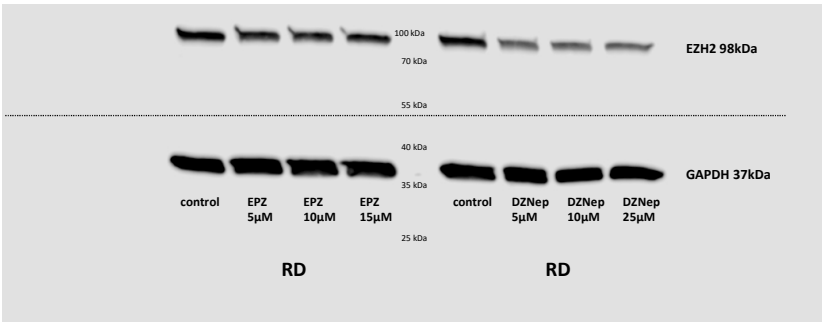

Supplement: s1 [file s1]
